# Supplementary material
Source: ML conference proceedings conference paper supplement (https://openaccess.thecvf.com/content/CVPR2025/html/Tang_AeroGen_Enhancing_Remote_CVPR_2025_paper.html)
Supplement: Supplementary file 1 [file Tang_AeroGen_Enhancing_Remote_CVPR_2025_supplemental.pdf]

# AeroGen: Enhancing Remote Sensing Object Detection with Diffusion-Driven Data Generation

## Supplementary Material

### 6. Limitations

Despite AeroGen’s notable advancements in generating tiny objects and enhancing datasets, some limitations persist. Firstly, the quality of AeroGen-generated data decreases markedly as the number of instances grows, especially beyond 20 objects, highlighting the need for enhanced performance in complex scenarios. Additionally, AeroGen supports only fixed-category generation in closed environments, restricting flexibility and limiting its applicability to diverse open-domain requirements, particularly for fine-grained control, which necessitates further refinement. While CLIP has been integrated to reduce instance confusion, it shows limited capability in understanding tiny targets in remote sensing images, potentially undermining generation accuracy. Moreover, the final augmented dataset is directly merged with real data for training. However, optimizing this process and developing more effective training strategies remain critical challenges.

### 7. AeroGen Implementation Details

We utilized three datasets, including DIOR/DIOR-R, with a 1:1:2 division for the training, validation, and test sets. Each category is accompanied by tailored text descriptions and a uniform prompt template applied to the entire image, as shown in Tab. 10. In the HRSC dataset, the most detailed categories were employed at each stage of generation, with all 19 categories encoded within the training set.

Training, testing, and data augmentation were performed on all three datasets, with images consistently resized to 512×512 dimensions using cropping, resizing, and other preprocessing techniques. Experiments employed the original SD 1.5 weights, training the DIOR/DIOR-R dataset for 100 epochs and HRSC for 20 epochs using the AdamW optimizer with a learning rate of 1e-5. All experiments were performed on an NVIDIA GeForce RTX 4090 GPU with a batch size of 4. In experiments with the Layout Mask Attention module, layout information was incorporated during the initial diffusion phase (timesteps 0–500) and transitioned to the text-to-image generation stage (timesteps 500–1000) to ensure the quality of synthetic data, as shown in Fig. 6.

| ID | Abbreviation | Category                | Description                     |
|----|--------------|-------------------------|---------------------------------|
| 0  | APL          | airplane                | airplane parked on the ground   |
| 1  | APO          | airport                 | busy airport                    |
| 2  | BF           | baseballfield           | green baseball field            |
| 3  | BC           | basketballcourt         | outdoor basketball court        |
| 4  | BR           | bridge                  | long bridge                     |
| 5  | CH           | chimney                 | tall chimney                    |
| 6  | DAM          | dam                     | large dam                       |
| 7  | ESA          | Expressway-Service-area | crowded expressway service area |
| 8  | ETS          | Expressway-toll-station | busy expressway toll station    |
| 9  | GF           | golffield               | well-maintained golf field      |
| 10 | GTF          | groundtrackfield        | athletic ground track field     |
| 11 | HA           | harbor                  | bustling harbor                 |
| 12 | OP           | overpass                | elevated overpass               |
| 13 | SH           | ship                    | ship on the water               |
| 14 | STA          | stadium                 | large stadium                   |
| 15 | STO          | storagetank             | industrial storage tank         |
| 16 | TC           | tennis court            | clay tennis court               |
| 17 | TS           | trainstation            | crowded train station           |
| 18 | VE           | vehicle                 | vehicle on the road             |
| 19 | WM           | windmill                | rotating windmill               |

Table 10. Category, abbreviation, and description Correspondence of the DIOR/DIOR-R dataset.

| No. | Category ID | Category Name           |
|-----|-------------|-------------------------|
| 0   | 100000001   | aircraft_carrier        |
| 1   | 100000003   | amphibious_assault_ship |
| 2   | 100000004   | submarine               |
| 3   | 100000005   | destroyer               |
| 4   | 100000006   | frigate                 |
| 5   | 100000007   | corvette                |
| 6   | 100000008   | patrol_vessel           |
| 7   | 100000009   | landing_ship            |
| 8   | 100000010   | mine_sweeper            |
| 9   | 100000011   | fast_attack_craft       |
| 10  | 100000012   | supply_ship             |
| 11  | 100000013   | medical_ship            |
| 12  | 100000015   | research_vessel         |
| 13  | 100000016   | fishing_boat            |
| 14  | 100000017   | cruise_ship             |
| 15  | 100000018   | cargo_ship              |
| 16  | 100000019   | container_ship          |
| 17  | 100000020   | tugboat                 |
| 18  | 100000022   | oil_tanker              |

Table 11. Category ID to name mapping of the HRSC dataset.

### 8. AeroGen Additional Implementation Details

#### 8.1. Qualitative results

In this section, we complement the results with more visualisations on the three datasets, as shown in Fig. 8. In addition, we provided additional analyses of AeroGen’s diversity to further demonstrate its generative capabilities, as illustrated in Fig.



Figure 6. Visualisation of the AeroGen generation process.



Figure 7. Synthesis of layout information based on DDPM.

## 9. Pipeline Enhancements Implementation Details

### 9.1. Label Generator

The visualisation of the conditions obtained based on the layout condition generator is shown in Fig. 7.

We use the following diversity enhancement strategy to get more diverse layout tags.

### 9.2. Additional experiments

We conducted comparative analysis with main diffusion models, including ReCo, LayoutDiffusion, GLIGEN, MIGC, and ODGEN. The evaluation was performed on COCO benchmark data to ensure consistent comparison conditions. As evidenced in Tab. 12, our AeroGen framework demonstrates competitive performance despite being designed without specific optimization for handling significant object occlusion in natural images.

### 9.3. Image Filter

This section describes the image filtering process. The CLIP model computes the cosine similarity  $\text{sim}_{\text{clip}}$  between

---

#### Algorithm 1 Bounding Box Data Augmentation with Transformations

---

**Require:** Original bounding box coordinates  $P = \{(x_1, y_1), (x_2, y_2), (x_3, y_3), (x_4, y_4)\}$ , image dimensions  $(width, height)$ , number of variants  $num\_variants$

**Ensure:** Augmented coordinates  $\{P'\}$

**for** each variant **do**

Sample random transformation parameters: scale  $s$ , translation  $(t_x, t_y)$ , rotation  $\theta$ , horizontal flip  $f_h$ , vertical flip  $f_v$ , and stretch factor  $stretch$

Set image center  $C = (width/2, height/2)$

Initialize augmented coordinates  $P' = P$

**for** each point  $(x_j, y_j)$  in  $P$  **do**

Apply transformations:

Scaling:  $(x_j, y_j) \leftarrow (x_j - C_x, y_j - C_y) \cdot s + (C_x, C_y)$

Translation:  $(x_j, y_j) \leftarrow (x_j + t_x, y_j + t_y)$

Rotation:  $(x_j, y_j) \leftarrow R(\theta) \cdot (x_j - C_x, y_j - C_y) + (C_x, C_y)$

Horizontal flip: if  $f_h$ , then  $x_j \leftarrow width - x_j$

Vertical flip: if  $f_v$ , then  $y_j \leftarrow height - y_j$

Stretch: if horizontal,  $x_j \leftarrow (x_j - C_x) \cdot stretch + C_x$ ; if vertical,  $y_j \leftarrow (y_j - C_y) \cdot stretch + C_y$

**end for**

Store augmented coordinates  $P'$  for this variant

**end for**

**return** Augmented coordinates  $\{P'\}$

---

the global text description and the synthetic image. The pretrained ResNet-101 model, trained on bounding box regions from the original dataset, evaluates the classification confidence for each region. The steps are as follows:

The visual experimental results are shown in the Fig. 10



Figure 8. Visualization of AeroGen’s diversity results. Each row of images originates from the same layout and exhibits variations in the corresponding background areas.

## 10. Analysis of Data Distribution

The real DIOR data and corresponding synthetic data are visualized using UMAP downscaling. In this visualization,



Figure 9. Visualization of data distributions on real-world data and synthetic data.

| Metric  | ReCo  | LayoutDiffusion | GLIGEN | MIGC  | ODGEN <sup>†</sup> | AeroGen |
|---------|-------|-----------------|--------|-------|--------------------|---------|
| FID ↓   | 26.19 | 25.93           | 24.53  | 22.10 | <b>16.16</b>       | 24.32   |
| mAP ↑   | 5.32  | 4.33            | 5.92   | 6.58  | <b>9.70</b>        | 6.42    |
| mAP50 ↑ | 12.74 | 9.71            | 13.20  | 14.89 | <b>18.90</b>       | 14.68   |

Table 12. Results on COCO dataset. †: taken from original paper.

---

### Algorithm 2 Synthetic Image Processing with Confidence Filtering and CLIP Similarity

---

**Require:** Synthetic image  $I$ , layout annotations  $B$ , global text description  $T$ , classifier model  $M_c$ , CLIP model  $M_{clip}$ , confidence threshold  $\tau$

**Ensure:** Filtered data

Compute  $\text{sim}_{clip} = M_{clip}(I, T)$

Initialize confidence list  $C = []$

Set high-confidence flag  $f_{high} = \text{True}$

**for** each bounding box  $b \in B$  **do**

    Crop and resize region  $I_b$  from  $I$  based on  $b$

    Transform  $I_b$  to tensor and pass through  $M_c$

    Compute confidence  $c = \max M_c(I_b)$

    Append  $c$  to  $C$

**if**  $c < \tau$  **then**

        Set  $f_{high} = \text{False}$  and break

**end if**

**end for**

**if**  $C \neq \emptyset$  **then**

    Calculate  $\text{avg}(C)$ ,  $\text{max}(C)$ , and  $\text{min}(C)$

**end if**

**if**  $f_{high} = \text{True}$  **then**

    Mark  $I$  as filtered

**end if**

**return** Filtered data

---



Figure 10. In the image filtering data visualization, the data in the top right corner represents the final filtered synthetic data.

the synthetic training set represents the original labels encountered by the generative model, while the layout labels in the test set are novel to AeroGen. The result shown as in Fig. 9. Given that DIOR is a dataset with clear inter-category relationships, the visualization area effectively reflects these relationships. However, the synthetic data does not align perfectly with the real data and appears more concentrated under the influence of specific categories.

## **11. Details of target detection model training**

In the target detection experiments, we train and evaluate models for horizontal bounding box (HBB) and rotating bounding box (OBB) detection, respectively. For the HBB modality, we selected the one single-stage detection model YOLOv8, set an initial learning rate of 0.01, and conducted 50 training epochs to optimize performance on the validation set. Subsequently, the model's performance was evaluated on the test set. For the OBB modality, we utilized Oriented R-CNN for rotating bounding box target detection, employing the official implementation from mmrotate. The optimizer applied stochastic gradient descent (SGD) with a learning rate of 0.0025, momentum set to 0.9, and a weight decay of 0.0001. A segmented learning rate descent strategy (STEP) was employed, featuring 500 warm-up iterations and a warm-up start ratio of 0, followed by 30 training epochs.
